# Supplementary material for: Detrimental incorporation of excess Cenp-A/Cid and Cenp-C intoDrosophilacentromeres is prevented by limiting amounts of the bridging factor Cal1
Source: Oxford University Press journal article supplement (doi:10.1242/jcs.067934), 2010-10-13
Supplement: jcs067934figs2.pdf [file jcs067934figs2.pdf]

Figure S2

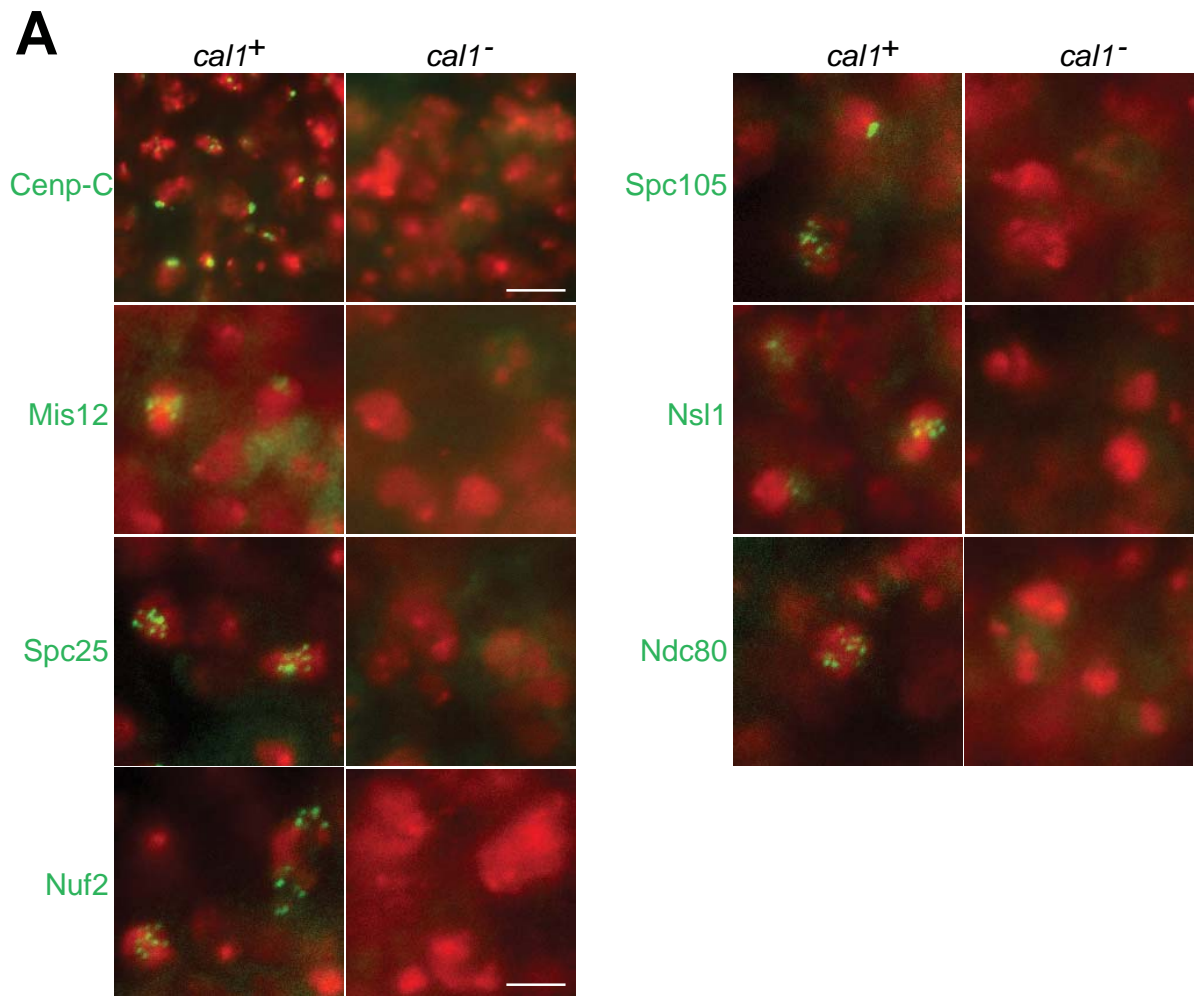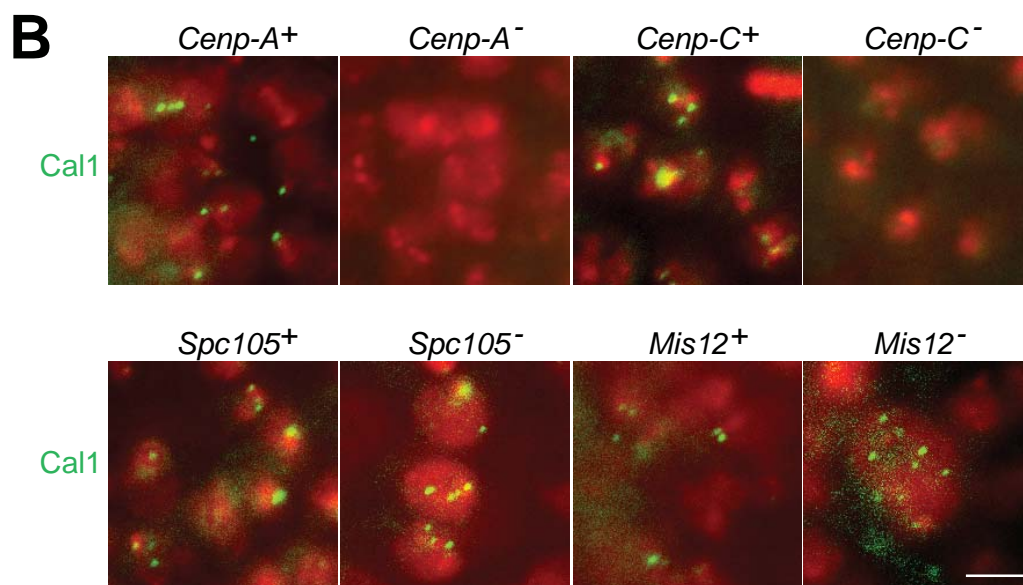

**Figure S2. Cal1 acts at the top of the kinetochore assembly pathway.**

(A) Localization of EGFP-fusions of Cenp-C, Spc105, Mis12, Nsl1, Spc25, Ndc80 and Nuf2 in homozygous *cal1*<sup>c03646</sup> embryos (*cal1*<sup>-</sup>) and in sibling control embryos (*cal1*<sup>+</sup>) within the CNS after germband retraction. Representative mitotic figures are shown with the kinetochore proteins in *green* and DNA staining in *red*. Magnification in the first two Cenp-C panels is indicated by the upper bar = 6  $\mu$ m; magnification in all other panels by the lower bar = 3  $\mu$ m.

(B) Localization of Cal1-EGFP in *cid*<sup>T12-1/cid</sup><sup>T22-4</sup> (*Cenp-A*<sup>-</sup>), *Cenp-C*<sup>pr141</sup> (*Cenp-C*<sup>-</sup>), *Spc105*<sup>l</sup> (*Spc105*<sup>-</sup>) and *Mis12*<sup>f03756</sup> (*Mis12*<sup>-</sup>) mutant embryos as well as in sibling control embryos (*Cenp-A*<sup>+</sup>, *Cenp-C*<sup>+</sup>, *Spc105*<sup>+</sup> and *Mis12*<sup>+</sup>, respectively). Representative regions with Cal1-EGFP in *green* and DNA staining in *red* are shown at the stage where phenotypic abnormalities start in the mutant embryos, i.e. during mitosis 16 in *Cenp-C* and *Spc105* mutants and during the later mitotic divisions in the CNS in *Mis12* and *Cenp-A/cid* mutants. Bar = 3  $\mu$ m.
