# Supplementary material for: Detrimental incorporation of excess Cenp-A/Cid and Cenp-C intoDrosophilacentromeres is prevented by limiting amounts of the bridging factor Cal1
Source: Oxford University Press journal article supplement (doi:10.1242/jcs.067934), 2010-10-13
Supplement: jcs067934figs6.pdf [file jcs067934figs6.pdf]

**Figure S6. Levels of overexpression of Cenp-A/Cid and Cenp-C in *Drosophila* embryos.**

(A) Total extracts of 5-8 h old  $w^1$  embryos and embryos overexpressing paternally derived *UAS-Cenp-A/cid* driven by maternal  *$\alpha 4tub$ -GAL4-VP16* were probed with anti-Cenp-A/Cid ( $\alpha$ -Cenp-A) and anti- $\alpha$ -Tubulin ( $\alpha$ -Tub), which served as loading control. The numbers indicate loading in embryo equivalents (above the lanes) or the position of molecular weight marker (kDa; left side). The asterisk marks a prominent, unspecific band.

(B and C) Paternally derived *UAS-Cenp-A/cid*, *UAS-Cenp-C* and *UAS-call-EGFP* or *UAS-call* were expressed individually or in combinations using maternal  *$\alpha 4tub$ -GAL4-VP16*. Total extracts were prepared and analyzed by immunoblotting as illustrated in panel A. The band intensities obtained with anti-Cenp-A/Cid (B) and anti-Cenp-C (C) were quantified (see Materials and Methods). The band intensity observed in the  $w^1$  control embryos was set to 100%. The type(s) of *UAS* transgene expressed is indicated below the bars.
